# Supplementary material for: Optimization for better Immunohistochemistry assay and more comprehensive pathological interpretation for PD-L1 expression in Classical Hodgkin lymphoma
Source: Research Square preprint supplement (doi:10.21203/rs.3.rs-1889973/v1), 2022-08-01
Supplement: Supplementary file 1 [file 11541de19a95fb0fe9a32ead.docx]

**Table 1** Details for scoring of the background immune cells(ICs) with associated biomarkers in CHL （n=52）

|  | **Density and scoring of ICs cells** | | | | |
| --- | --- | --- | --- | --- | --- |
| **percentage Range (%)** | **Average (%)** | **1+（%）** | **2+（%）** | **3+（%）** |
| **CD4+Ths** | 3.0～60.0 | 21.4 | 3 (5.6) | 33 (61.1) | 18(33.3) |
| **FOXP3+Tregs** | 0.5～40.0 | 12.6 | 9 (16.7) | 42 (77.8) | 3(5.6) |
| **CD8+ CTLs** | 3.0～65.0 | 22.0 | 1 (1.9) | 34 (63.0) | 19(35.2) |
| **CD163+TAMs** | 1.0～50.0 | 15.2 | 12 (22.2) | 34 (63.0) | 8(14.8) |

Note：CD4+ Ths (T helper cells), CD8+ CTLs (cytotoxic T cells), FOXP3+ regulatory T cells (Tregs) and CD163+ TAMs (tumor associated macrophages). The relative percentage of positively stained ICs by certain makers in relation to overall cellularity in tumor cell regions were calculated and grade IHC score as: <5%= 1+, 5%-25%= score 2+, >25% = score 3+.
